# Supplementary material for: Fabrication of hierarchical porous MnCo2O4 and CoMn2O4 microspheres composed of polyhedral nanoparticles as promising anodes for long-life LIBs
Source: Royal Society of Chemistry journal article supplement (doi:10.1039/c5ta03145a), 2015-01-01
Supplement: c5ta03145a1.pdf [file c5ta03145a1.pdf]

## Supporting Information

### Fabrication of hierarchical mesoporous $\text{MnCo}_2\text{O}_4$ and $\text{CoMn}_2\text{O}_4$ microspheres that are composed of polyhedral nanoparticles as promising anodes for long-life LIBs

Guangda Li, Liqiang Xu,\* Yanjun Zhai and Yaping Hou

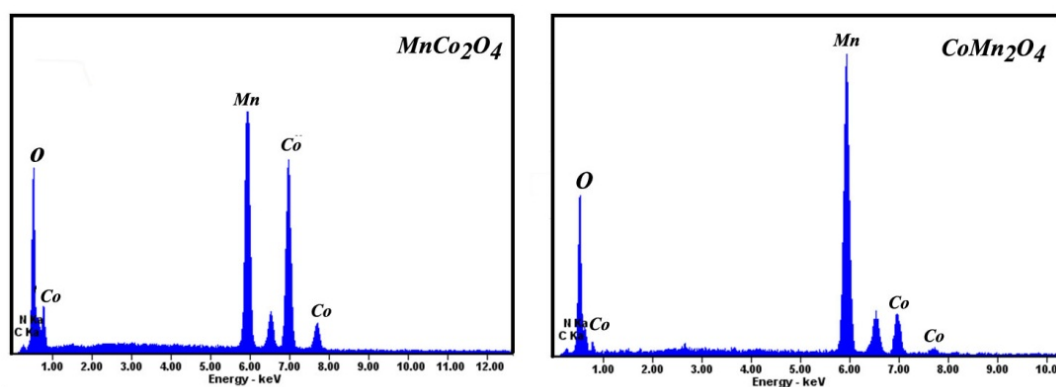

Fig. S1 EDX spectra of the as-obtained  $\text{MnCo}_2\text{O}_4$  and  $\text{CoMn}_2\text{O}_4$ .

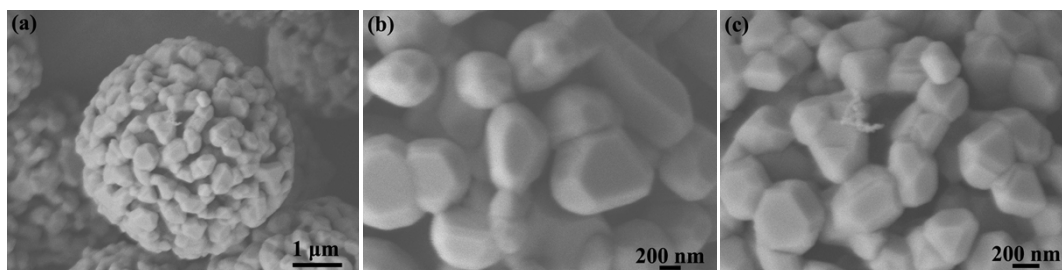

Fig. S2 Magnified SEM images of the porous  $\text{MnCo}_2\text{O}_4$  microsphere.

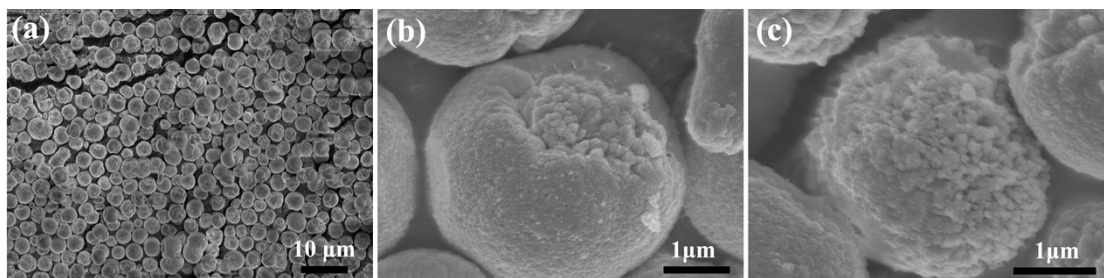

**Fig. S3** FESEM images of  $\text{Mn}_{0.33}\text{Co}_{0.67}\text{CO}_3$  (MnCo-precursor).

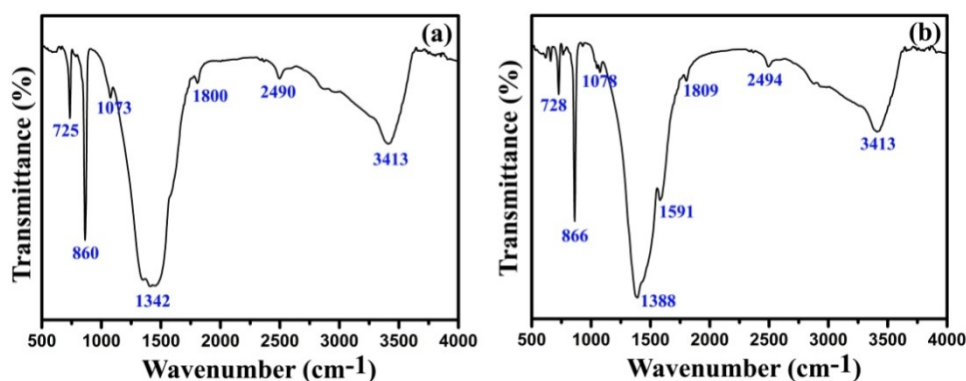

**Fig. S4** FTIR spectra of the precursors of (a)  $\text{Mn}_{0.33}\text{Co}_{0.67}$  and (b)  $\text{Co}_{0.33}\text{Mn}_{0.67}\text{CO}_3$ .

The peak centered at  $3413\text{cm}^{-1}$  evidences the presence of O-H stretching vibration, indicating a tiny amount of moisture exists in samples. The stretching vibration and the in-plane flexural vibration of the N-H bond are observed at  $2490$  and  $1800\text{cm}^{-1}$ , respectively, which come from HMT adsorption on the precursors. In addition, the peaks at  $1388$ ,  $1073$ ,  $866$ ,  $728\text{cm}^{-1}$ , a feature of carbonate,<sup>[1-2]</sup> can be ascribed to the  $\text{Mn}_{0.33}\text{Co}_{0.67}$  and  $\text{Co}_{0.33}\text{Mn}_{0.67}\text{CO}_3$  precursors.

[1] P. Huang, X. Zhang, J. M. Wei, J. Q. Pan, Y. Z. Sheng, B. X. Feng, *Mater. Chem. Phys.*, **2014**, *147*, 996.

[2] L. M. Song, S. J. Zhang, X. Q. Wu, Z. L. Wang, Q. W. Wei, *Chem. Eng. J.*, **2012**, *15*, 195.

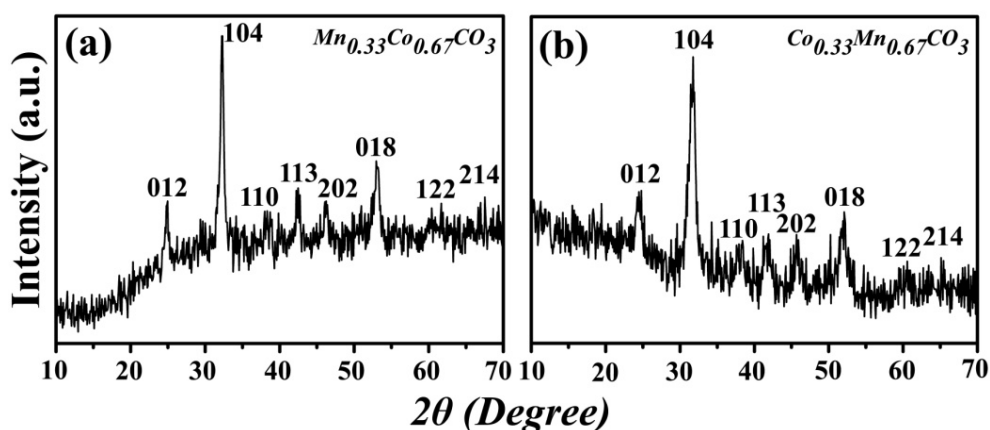

**Fig. S5** XRD patterns of the precursors of (a)  $Mn_{0.33}Co_{0.67}CO_3$  and (b)  $Co_{0.33}Mn_{0.67}CO_3$ .

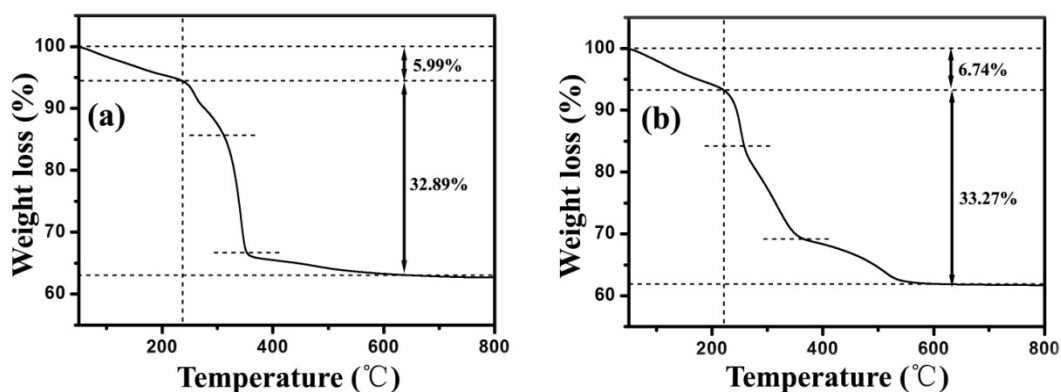

**Fig. S6** TGA curves of the (a)  $Mn_{0.33}Co_{0.67}CO_3$  and (b)  $Co_{0.33}Mn_{0.67}CO_3$  precursors.

In order to investigate the thermal behavior of  $Mn_{0.33}Co_{0.67}CO_3$  and  $Co_{0.33}Mn_{0.67}CO_3$  microspheres, TGA curves of the precursors under atmosphere are shown in Figure S5. The TGA curves could be categorized into two major weight loss processes. The first weight loss below  $\sim 230$   $^{\circ}C$  is attributed to the loss of physical and chemical adsorption on the surface of precursor particles, such as  $H_2O$ , HMT and other organic compounds which produced in solvothermal process. The second conspicuous weight loss is due to the thermal decomposition of precursors into

MnCo<sub>2</sub>O<sub>4</sub> and CoMn<sub>2</sub>O<sub>4</sub>, and at the same time, released CO<sub>2</sub> with temperature increasing. For Mn<sub>0.33</sub>Co<sub>0.67</sub>CO<sub>3</sub> and Co<sub>0.33</sub>Mn<sub>0.67</sub>CO<sub>3</sub> precursors, the value of the second weight are 32.89% and 32.27%, respectively, which are very consistent with the theoretical value (32.87% and 33.23%). TGA, together with XRD and IR, confirmed the ingredient of the precursors perfectly. Furthermore, it was also found that the second major weight loss can be divided into three processes because of the different thermal behaviors of MnCO<sub>3</sub> and CoCO<sub>3</sub>. The similar phenomenon was also observed in previous works.<sup>[1,2]</sup> According to the TGA curves, the optimal temperature for obtaining MnCo<sub>2</sub>O<sub>4</sub> and CoMn<sub>2</sub>O<sub>4</sub> is carried out at 600 °C.

[1] J. F. Li, S. L. Xiong, X. W. Li, Y. T. Qian, *Nanoscale*, **2013**, 5, 2045.

[2] X. F. Chen, L. L. Zhang, W. X. Zhang, Y. H. Huang, *J. Alloy Comp.*, **2013**, 559, 5.

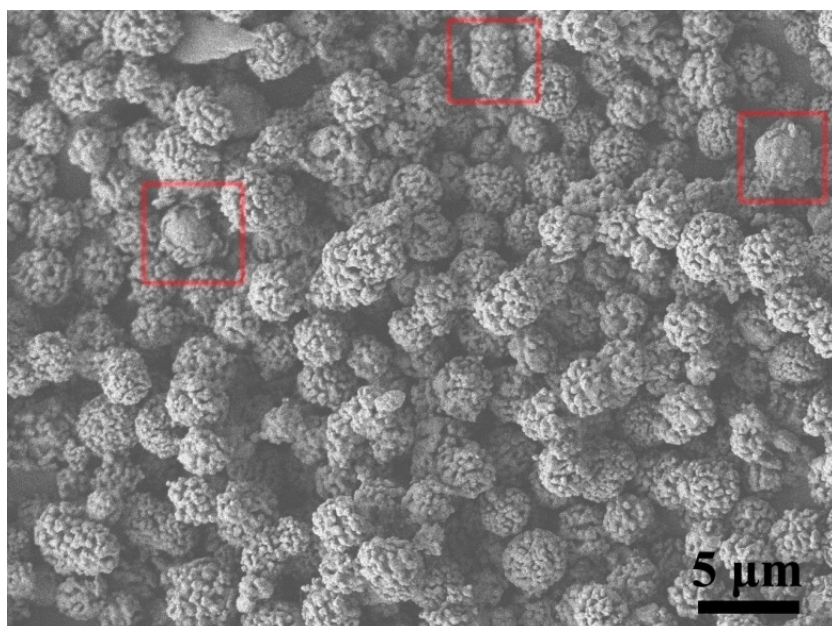

**Fig. S7** FESEM image of the  $\text{Mn}_{0.33}\text{Co}_{0.67}\text{CO}_3$  after annealed for 4 h at 600 °C.

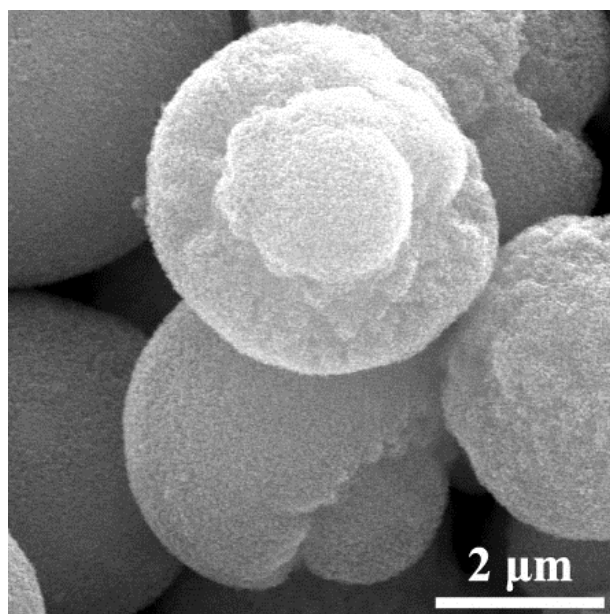

**Fig. S8** FESEM image of the broken  $\text{MnCo}_2\text{O}_4$  microsphere at 600 °C for 6 h.

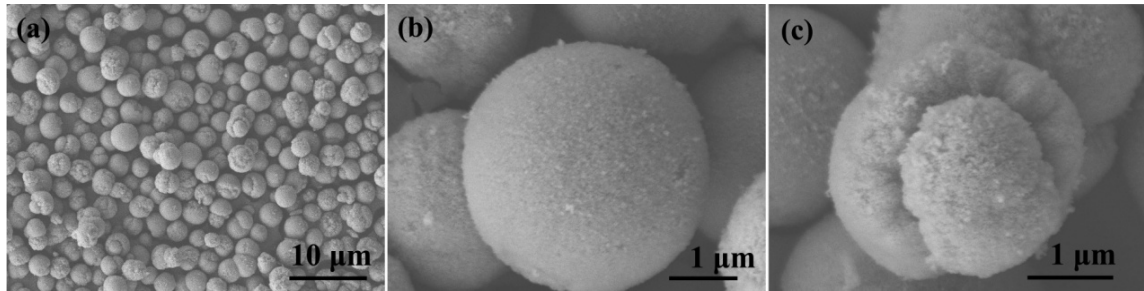

**Fig. S9** FESEM image of the  $\text{Mn}_{0.33}\text{Co}_{0.67}\text{CO}_3$  annealed for 10 h at 600 °C.

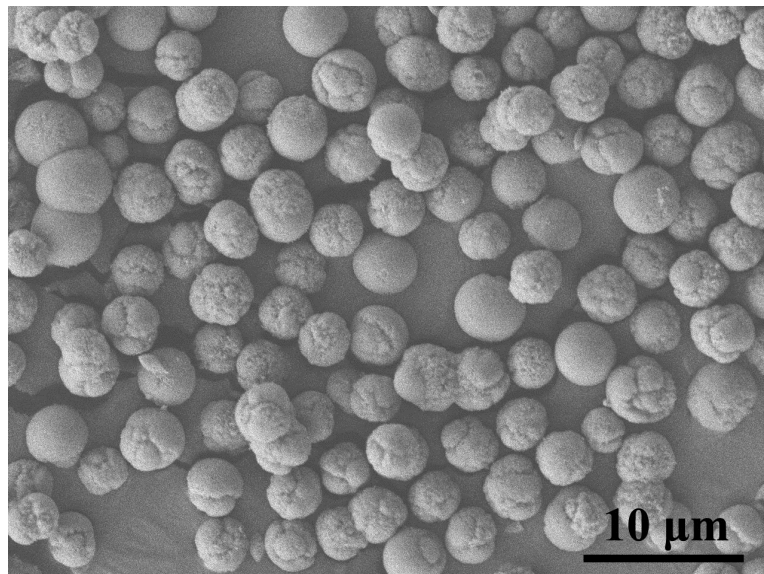

**Fig. S10** FESEM image of the  $\text{Mn}_{0.33}\text{Co}_{0.67}\text{CO}_3$  annealed for 12 h at 600 °C.

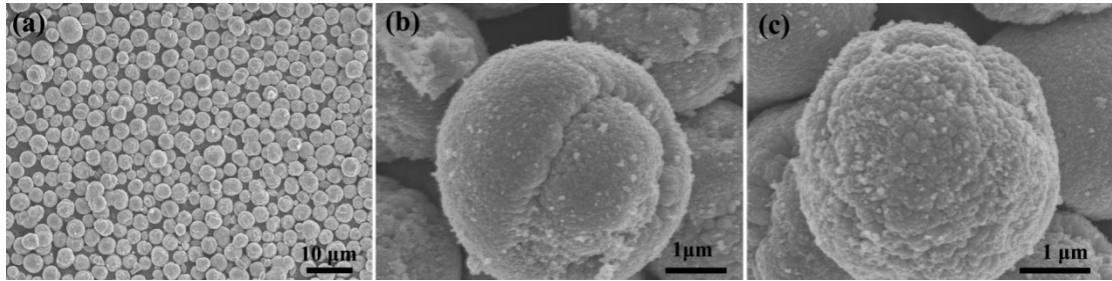

**Fig. S11** FESEM image of the  $\text{Mn}_{0.33}\text{Co}_{0.67}\text{CO}_3$  annealed for 16 h at 600 °C.

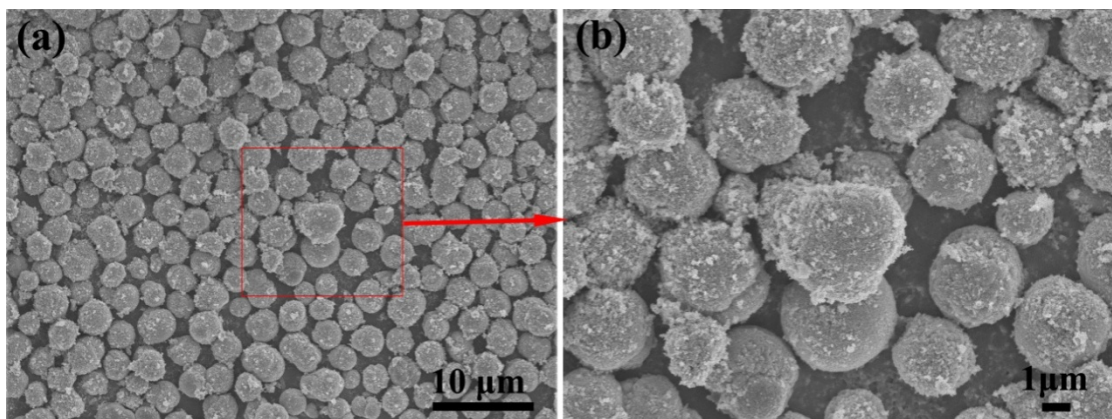

**Fig. S12** FESEM image of the  $\text{Mn}_{0.33}\text{Co}_{0.67}\text{CO}_3$  annealed for 24 h at 600 °C.

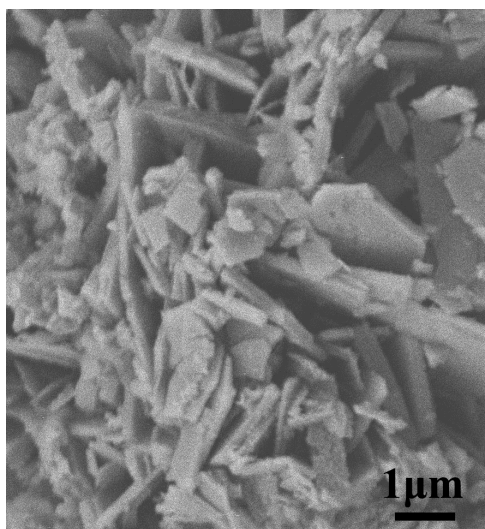

**Fig. S13** FESEM image of the product in the absence of HMT in the reaction system.



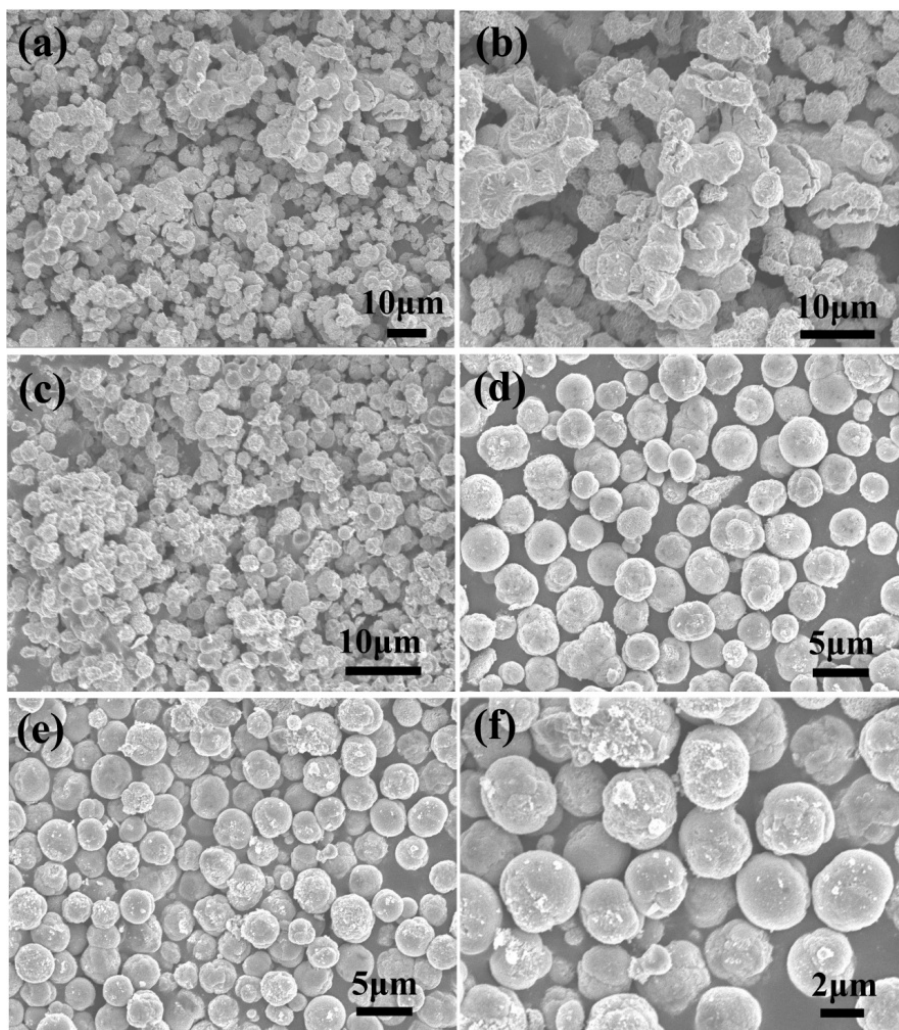

**Fig. S14** FESEM images of the products obtained using different masses of HMT: (a,b) 0.1 g; (c) 0.5 g; (d) 3.0 g; (e,f) 5.0 g.

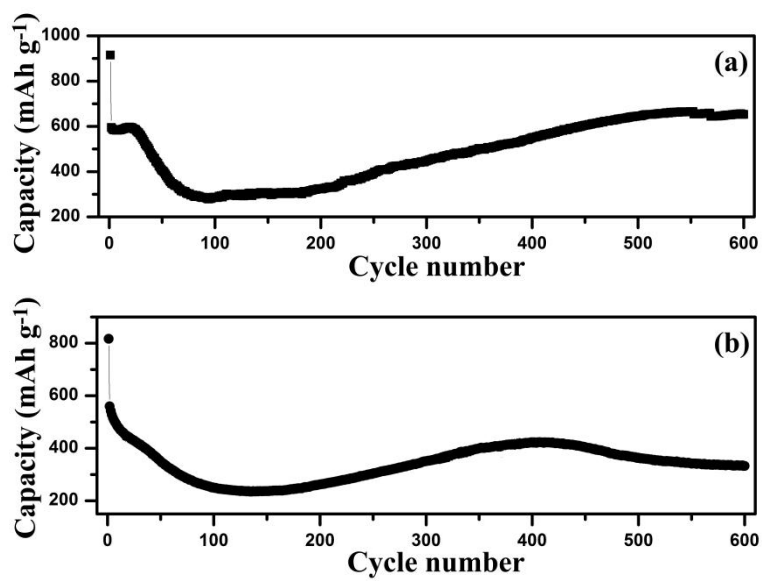

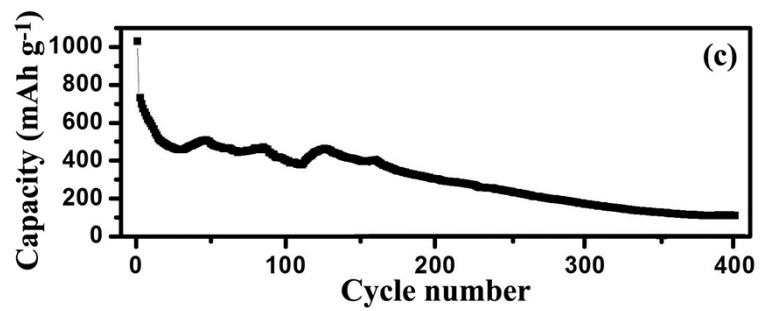

**Fig. S15** Cycling performances of the yolk-shell structured (a)  $\text{MnCo}_2\text{O}_4$  and (b)  $\text{CoMn}_2\text{O}_4$  microspheres; (c) solid  $\text{MnCo}_2\text{O}_4$  spheres at  $1000 \text{ mAh g}^{-1}$ .

**Table S1** Morphology change processes of the mesoporous MnCo<sub>2</sub>O<sub>4</sub> microspheres at different annealing time.

| <b>Sample images</b> | <b>Fig. S2</b>                                                          | <b>Fig. 3</b>                                                  | <b>Fig. S6</b>                                               | <b>Fig. 5 and S7</b>       |
|----------------------|-------------------------------------------------------------------------|----------------------------------------------------------------|--------------------------------------------------------------|----------------------------|
| Conditions           | 180 °C 12h                                                              | 600°C 2 h                                                      | 600°C 4h                                                     | 600°C 6h                   |
| Morphologies         | MnCo-presursor<br>Mn <sub>0.33</sub> Co <sub>0.66</sub> CO <sub>3</sub> | Mesoporous<br>MnCo <sub>2</sub> O <sub>4</sub><br>microspheres | Transitional<br>state to<br>forming yolk-<br>shell structure | Yolk-shell<br>microspheres |
| <b>Sample images</b> | <b>Fig. S8</b>                                                          | <b>Fig. S9</b>                                                 | <b>Fig. S10</b>                                              | <b>Fig. S11</b>            |
| Conditions           | 600°C 10h                                                               | 600°C 12h                                                      | 600°C 16h                                                    | 600°C 24h                  |
| Morphologies         | Broken<br>microspheres                                                  | Broken<br>microspheres                                         | Yolk and<br>shell merge<br>together<br>gradually             | Solid<br>microspheres      |

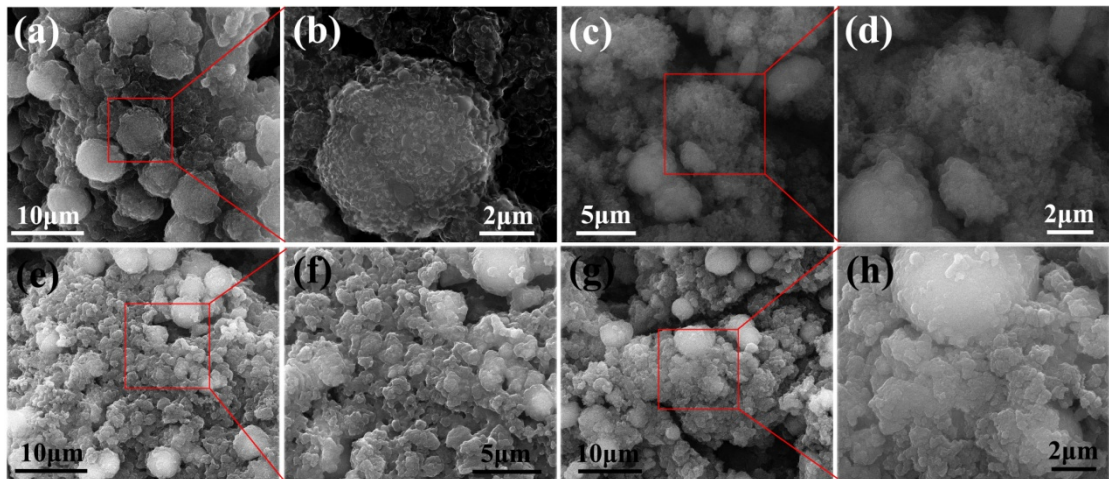

**Fig. S16** FESEM images of the porous MnCo<sub>2</sub>O<sub>4</sub> and CoMn<sub>2</sub>O<sub>4</sub> microspheres after cycles: (a, b) MnCo<sub>2</sub>O<sub>4</sub> after 200 cycles; (c, d) CoMn<sub>2</sub>O<sub>4</sub> after 200 cycles; (e, f) MnCo<sub>2</sub>O<sub>4</sub> after 1000 cycles; (g, h) CoMn<sub>2</sub>O<sub>4</sub> after 1000 cycles.

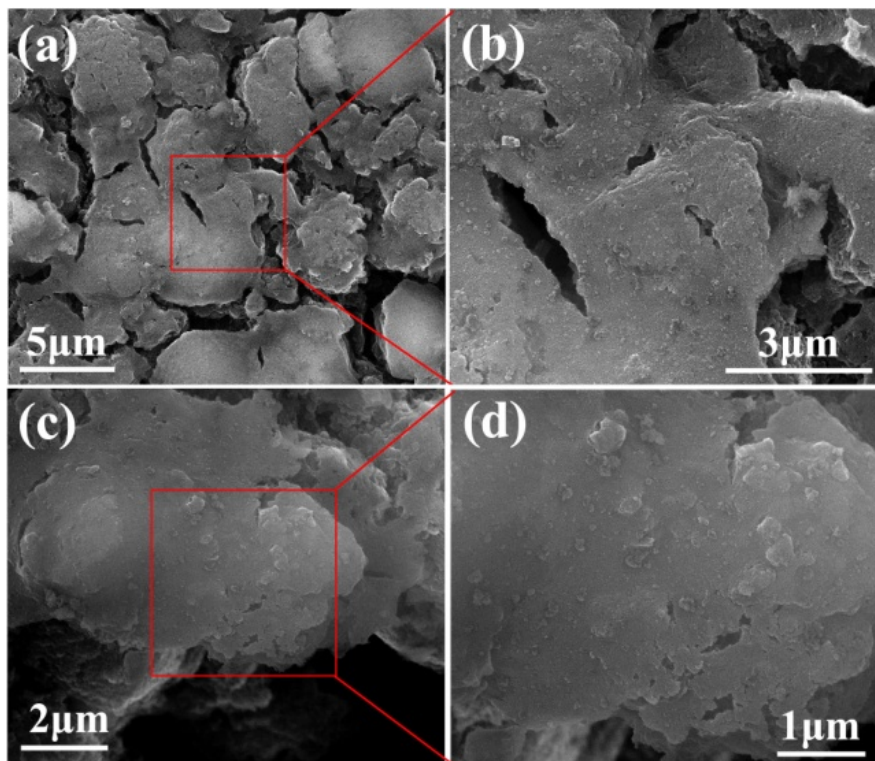

**Fig. S17** SEI investigations of the porous (a, b) MnCo<sub>2</sub>O<sub>4</sub> and (c, d) CoMn<sub>2</sub>O<sub>4</sub> microspheres after 1000 cycles.

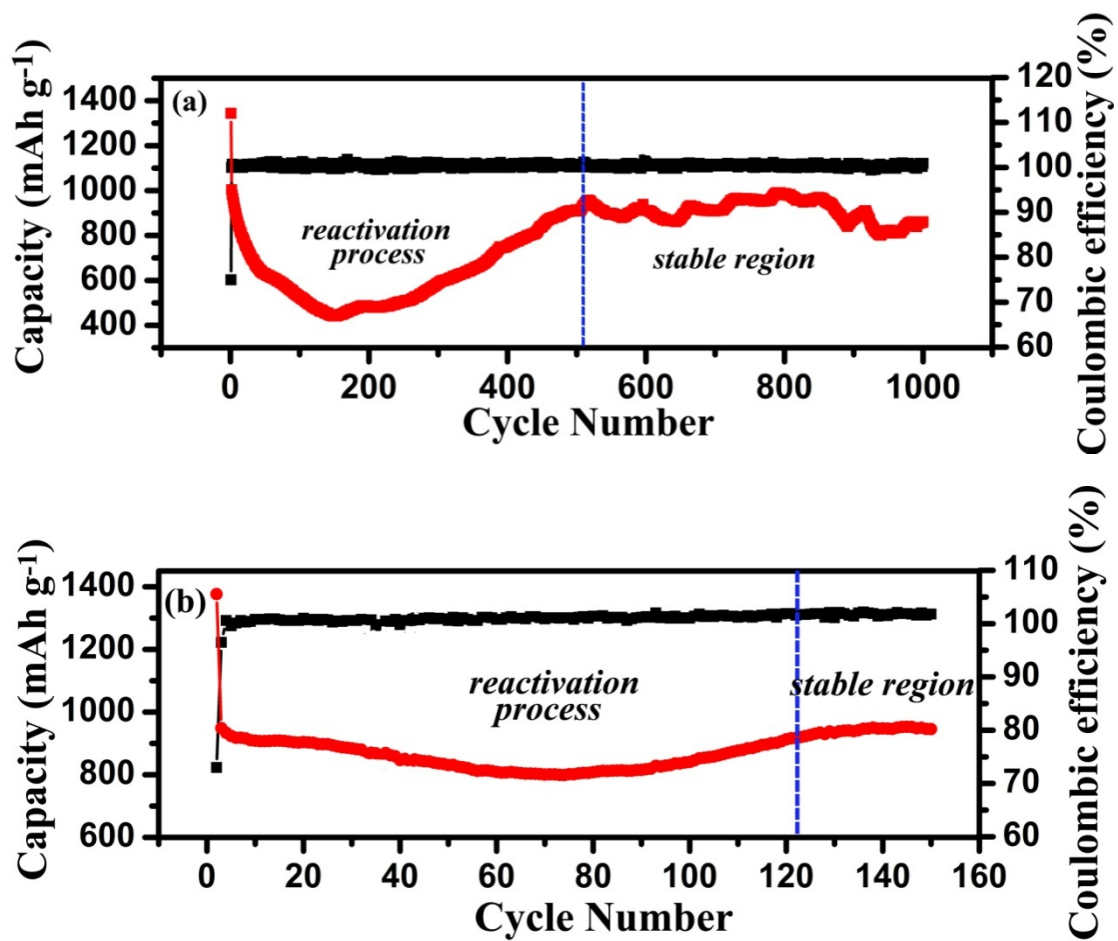

**Fig. S18** Cycling performance of the mesoporous MnCo<sub>2</sub>O<sub>4</sub> and CoMn<sub>2</sub>O<sub>4</sub> microspheres electrode at a current density of 200 mA g<sup>-1</sup>.

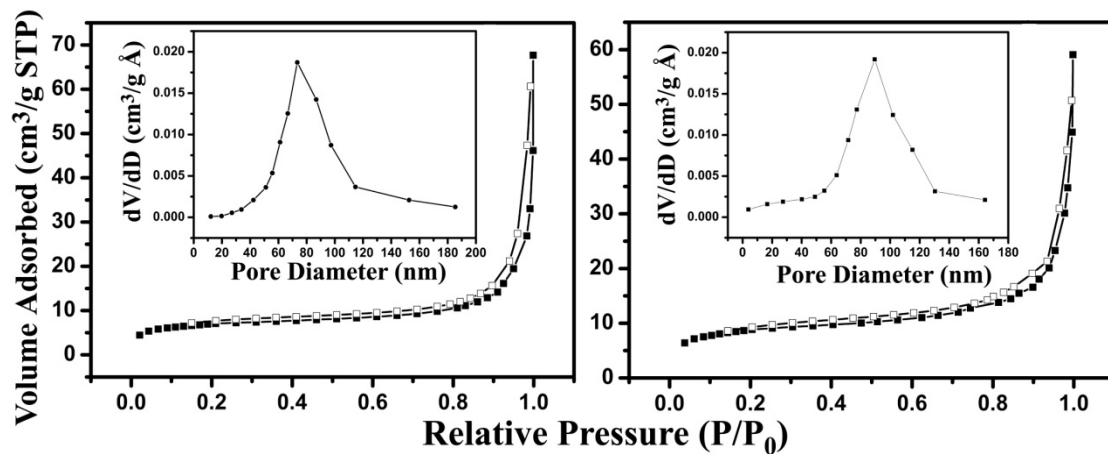

**Fig. S19**  $N_2$  adsorption/desorption isotherm and the corresponding pore size distribution of mesoporous  $MnCo_2O_4$  and  $CoMn_2O_4$  microspheres.

**Table S2** Comparison of the cycling performance of MnCo<sub>2</sub>O<sub>4</sub> and CoMn<sub>2</sub>O<sub>4</sub> between our work and previous reports.

| Samples                                                                   | Current density (mA g <sup>-1</sup> ) | Cycle number | Reversible capacity (mAh g <sup>-1</sup> ) | Ref.      |
|---------------------------------------------------------------------------|---------------------------------------|--------------|--------------------------------------------|-----------|
| MnCo <sub>2</sub> O <sub>4</sub> nanowire                                 | 200                                   | 50           | 800                                        | 1         |
| MnCo <sub>2</sub> O <sub>4</sub> microsphere                              | 200                                   | 25           | 722                                        | 2         |
| MnCo <sub>2</sub> O <sub>4</sub> submicrosphere                           | 400                                   | 100          | 670                                        | 3         |
| MnCo <sub>2</sub> O <sub>4</sub> quasi-hollow sphere                      | 200                                   | 25           | 755                                        | 4         |
| CoMn <sub>2</sub> O <sub>4</sub> quasi-hollow sphere                      | 200                                   | 25           | 706                                        | 4         |
| MnCo <sub>2</sub> O <sub>4</sub> bulks or powders                         | 681                                   | 50           | 400                                        | 5         |
| CoMn <sub>2</sub> O <sub>4</sub> bulks or powders                         | 691                                   | 50           | 400                                        | 5         |
| CoMn <sub>2</sub> O <sub>4</sub> hollow microsphere                       | 200                                   | 50           | 624                                        | 6         |
| Mn <sub>1.5</sub> Co <sub>1.5</sub> O <sub>4</sub> core-shell microsphere | 400                                   | 300          | 618                                        | 7         |
| CoMn <sub>2</sub> O <sub>4</sub> powder                                   | 80                                    | 50           | 330                                        | 8         |
| Mesoporous MnCo <sub>2</sub> O <sub>4</sub> microsphere                   | 1000                                  | 1000         | 740                                        | This work |
| Mesoporous CoMn <sub>2</sub> O <sub>4</sub> microsphere                   | 1000                                  | 1000         | 420                                        | This work |

- [1] S. G. Mohamed, T. F. Hung, C. J. Chen, C. K. Chen, S. F. Hu, R. S. Liu, *RSC Adv.*, **2014**, 4, 17230.
- [2] C. C. Fu, G. S. Li, D. Luo, X. S. Huang, J. Zheng, L. P. Li, *ACS Appl. Mater. Interfaces*, **2014**, 6, 2439.
- [3] J. F. Li, J. Z. Wang, X. Liang, Z. J. Zhang, H. K. Liu, Y. T. Qian, *ACS Appl. Mater. Interfaces*, **2014**, 6, 24.
- [4] J. F. Li, S. L. Xiong, X. W. Li, Y. T. Qian, *Nanoscale*, **2013**, 5, 2045.
- [5] P. Lavala, J. L. Tirado, T. Vidal-Abarca, *Electrochim. Acta*, **2007**, 52, 7986.
- [6] L. Zhou, D. Y. Zhao, X. W. Lou, *Adv. Mater.*, **2012**, 24, 745.
- [7] J. F. Li, S. L. Xiong, X. W. Li, Y. T. Qian, *J. Mater. Chem.*, **2012**, 22, 23254.
- [8] F. M. Courtel, H. Duncan, Y. Abu-Lebdeh, I. J. Davidson, *J. Mater. Chem.*, **2011**, 21, 10206.
